# Supplementary material
Source: PubMed Central journal article supplement (PMC4067552)
Supplement: mmc1.pdf [file mmc1.pdf]

The American Journal of Human Genetics, Volume 94

Supplemental Data

## **Recurrent CNVs and SNVs at the *NPHP1* Locus**

### **Contribute Pathogenic Alleles to Bardet-Biedl Syndrome**

Anna Lindstrand, Erica E. Davis, Claudia M.B. Carvalho, Davut Pehlivan, Jason R. Willer, I-Chun Tsai, Subhadra Ramanathan, Craig Zuppan, Aniko Sabo, Donna Muzny, Richard Gibbs, Pengfei Liu, Richard A. Lewis, Eyal Banin, James R. Lupski, Robin Clark, and Nicholas Katsanis

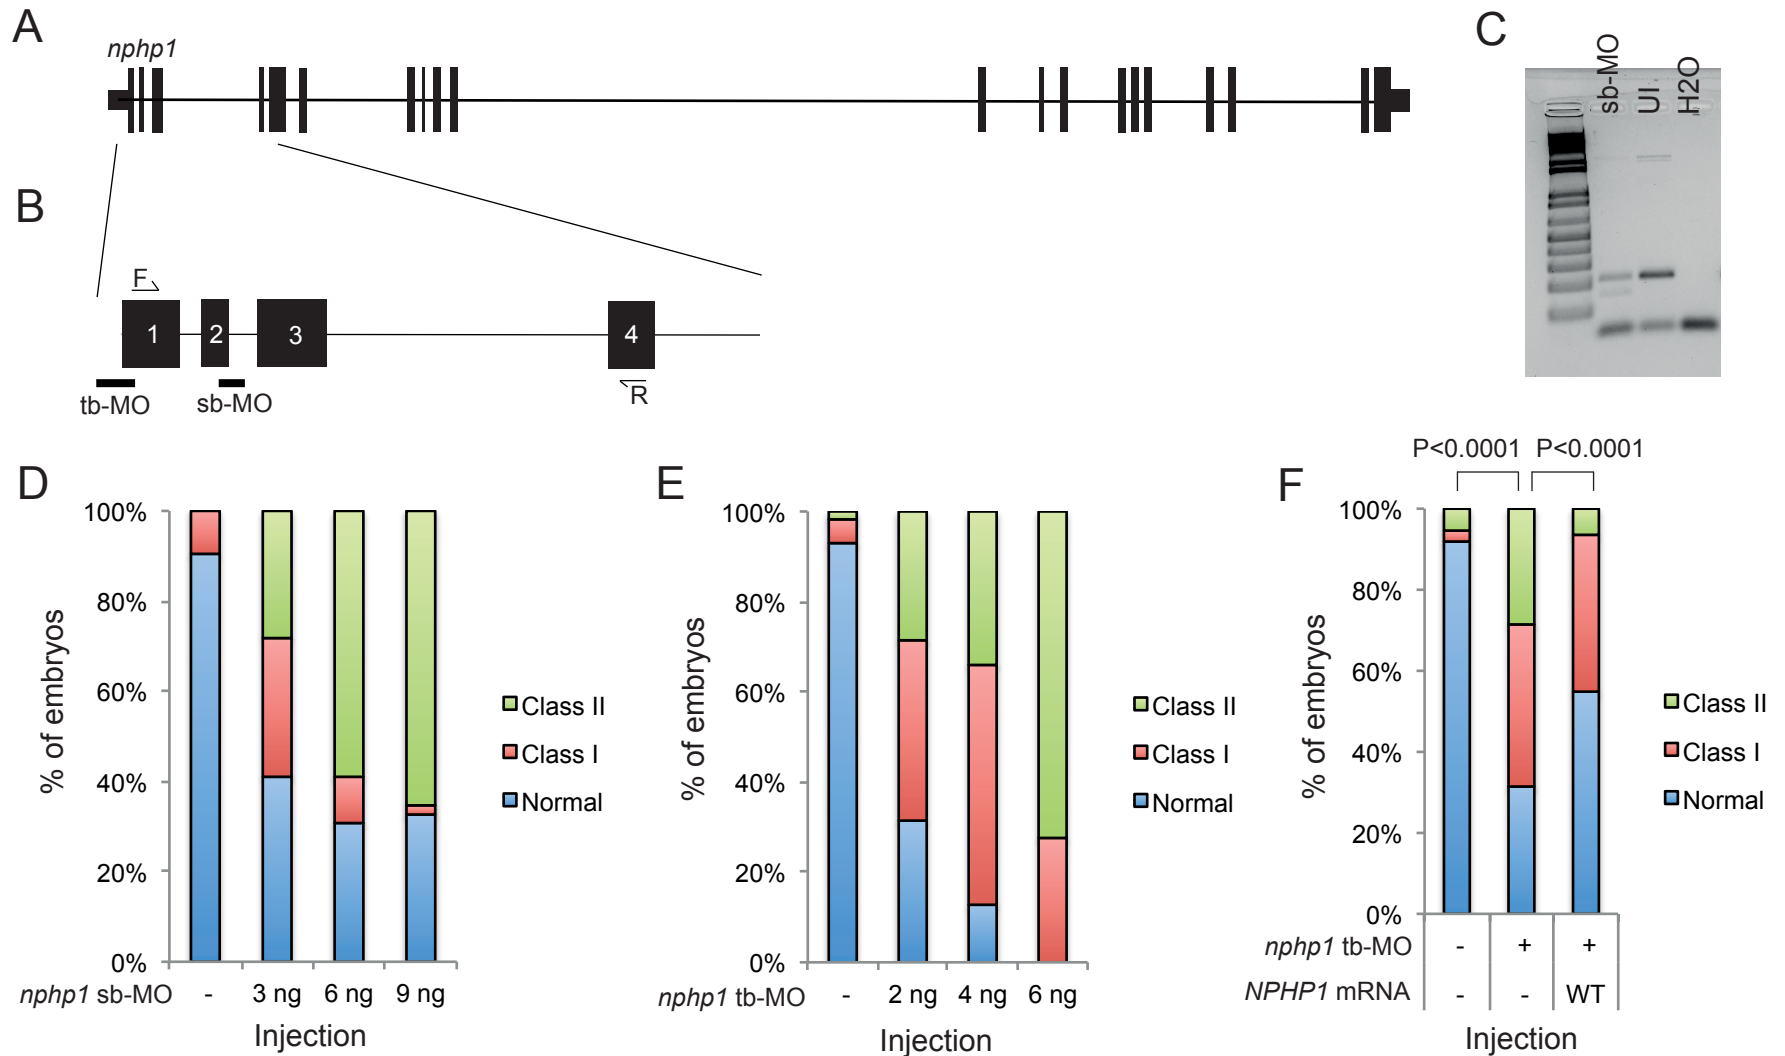

**Figure S1: Knockdown efficiency of the *npHP1* morpholinos in zebrafish embryos**

(A) Schematic illustration of the *D. rerio npHP1* (NM\_001077170.1) locus.

(B) A zoomed schematic of exon 1 through exon 4 illustrating the position of the translational blocking (tb) and splice blocking (sb) MOs and RT-PCR primer target location. Total RNA was extracted from 10-somite stage embryos injected with 3ng of *npHP1* sb-MO (targeting exon2/intron2-3). After cDNA synthesis RT-PCR was performed with primers flanking the sb-MO target sites (F and R).

(C) Aberrant splicing was clearly visible by agarose gel electrophoresis following PCR amplification.

(D) Dose response curve for *npHP1* sb-MO. Wild type zebrafish embryos were injected at the 1 to 4 cell stage with the indicated dose. Embryos were kept at 23° C and scored live for gastrulation defects 24h post fertilization, mutant embryos were subdivided into class I or class II depending on the severity of the phenotype.

(E) Dose response curve for *npHP1* tb-MO as in (D).

(F) Co-injections of *npHP1* tb-MO with wild type (WT) human *NPHP1* mRNA result in a significant decrease in the number of morphant class I and class II embryos compared to tb-MO injected batches ( $P < 0.0001$ ).

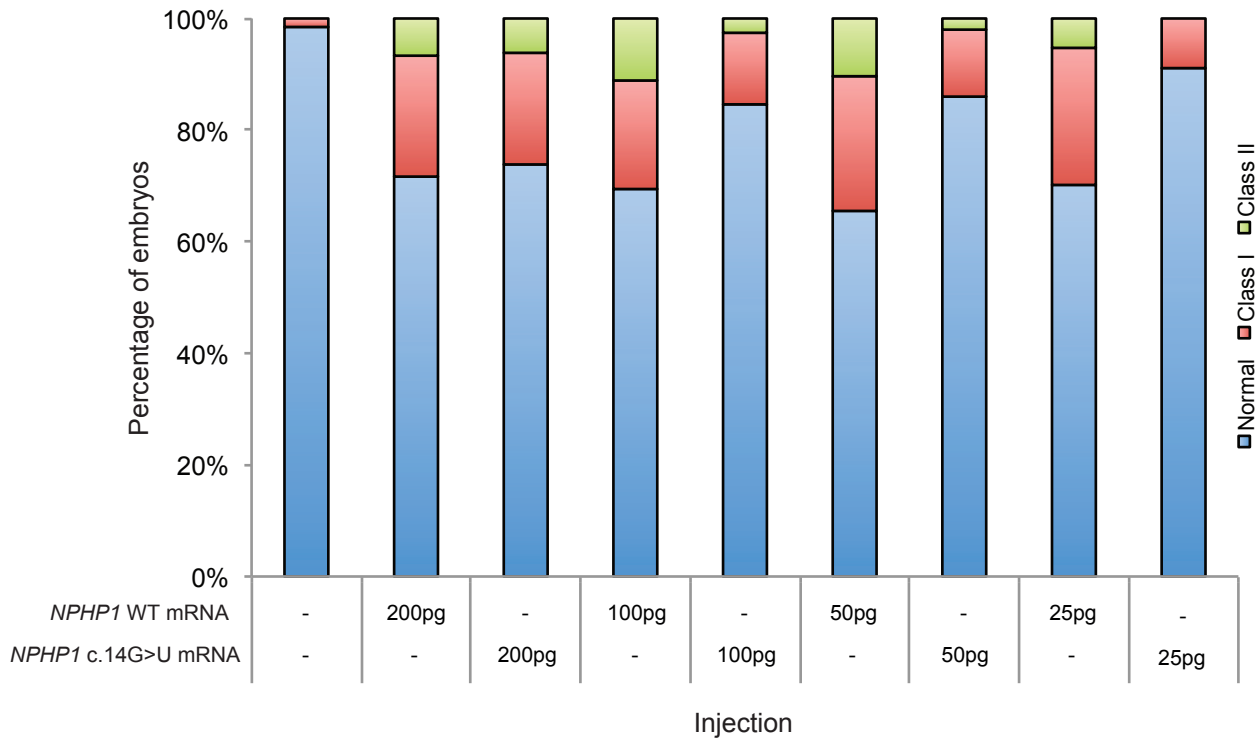

**Figure S2: Dose response curve of *NPHP1* wild-type and c.14G>U mRNA.**

Zebrafish embryos were injected with progressively decreasing concentrations of either wild-type (WT) or mutant (c.14G>U) human *NPHP1* mRNA and scored for gastrulation defects at the midsomite stage (see Figure 3A for representative images of each phenotypic class). WT mRNA results in a persistent, mild phenotype affecting ~30% of embryo batches; c.14G>U mRNA produces a progressive decrease in the number of affected embryos, supporting the notion that this is a loss-of-function variant (n=29-66 embryos/injection batch, repeated at least twice, with masked scoring).

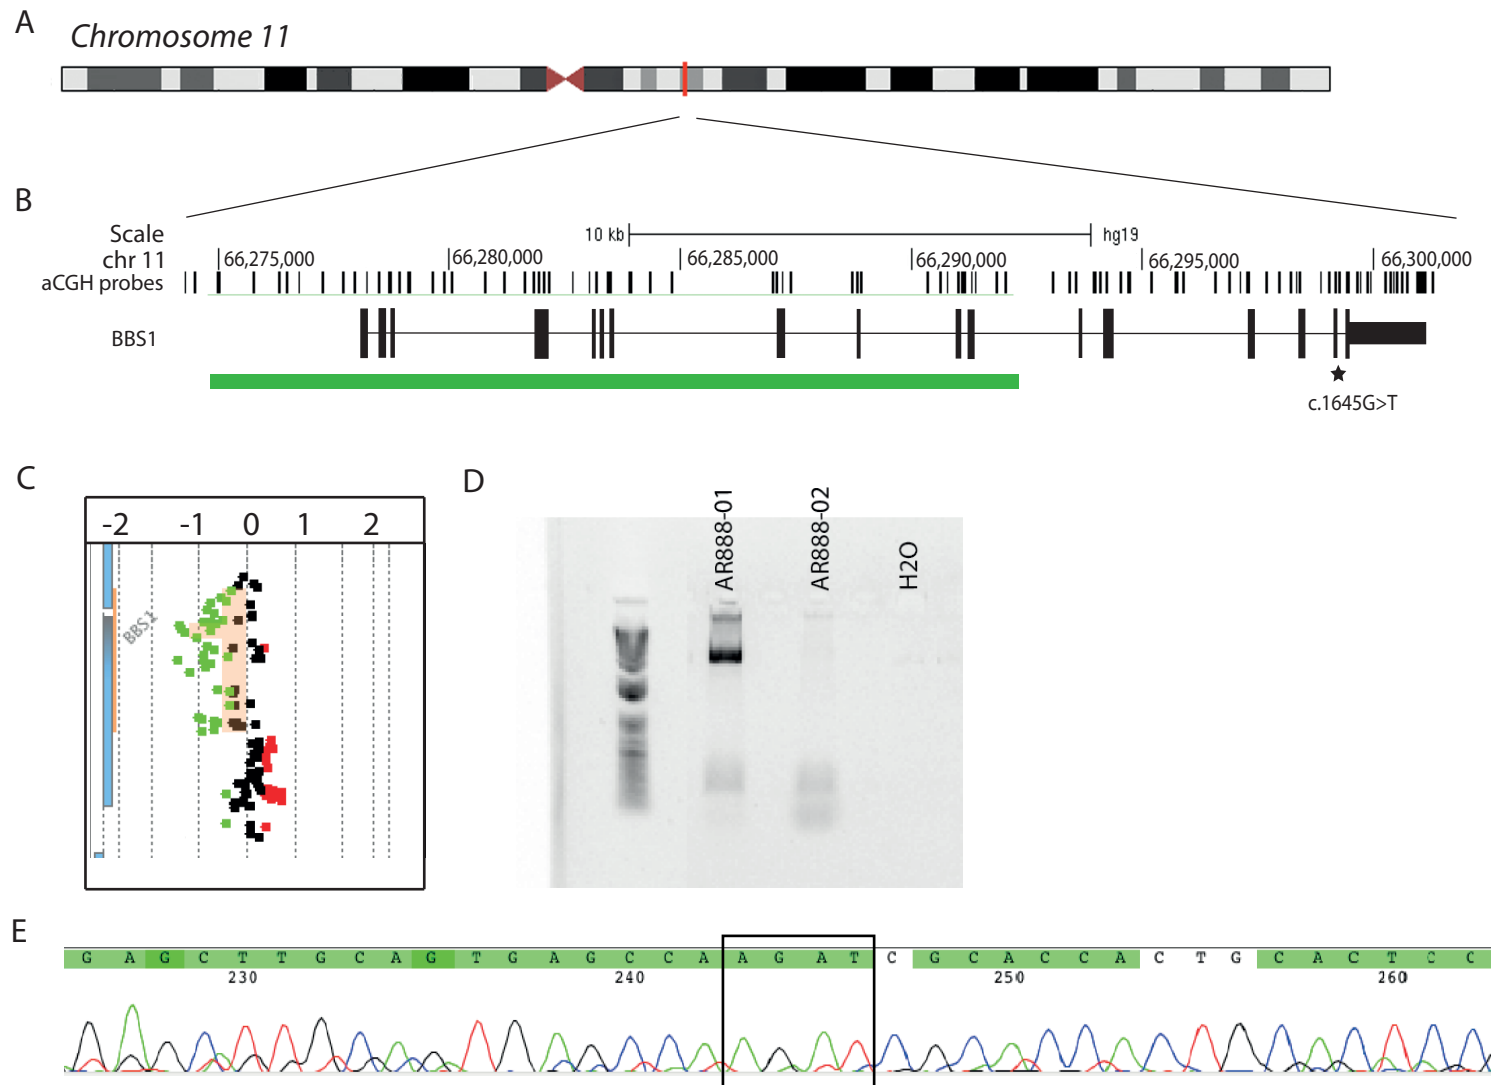

**Figure S3: Characterization of the 17.7kb *BBS1* deletion in family AR888**

(A) Schematic of human chromosome 11. A vertical red line indicates the position of *BBS1* (NM\_024649.4) at 11q13.2.

(B) A zoomed depiction of the *BBS1* locus with a schematic illustration of exons (vertical blue bars). The genomic location on chromosome 11 (in Mb) is shown and the distribution of array comparative genomic hybridization (aCGH) probes. The solid green bar below the gene represents the genomic location of the deletion identified in AR888-03. The location of the heterozygous c.1645G>T (p.Glu549\*) mutation is marked by a star.

(C) High-resolution results from the aCGH analyses in individual AR888-03 are visualized as a plot. The horizontal blue bar represents *BBS1*. Individual dots represent specific oligonucleotide probes and are indicated as black (normal copy number), red (copy number gain), and green (copy number loss) compared to a reference sample. The normalized log<sub>2</sub> ratios of the Cy5/Cy3 intensity values for cases versus controls are shown on the Y-axis.

(D) Segregation of the *BBS1* deletion in the AR888 family. Deletion carriers are identified by clearly resolvable bands on an agarose gel electrophoresis following PCR amplification. Individual 01 harbors the deletion.

(E) Sequence traces from Sanger sequencing of the breakpoint PCR product shown in (D). A 4 bp micro-homology is present.

**Table S1: Phenotypic scoring and statistical significance of interactions for zebrafish embryo injections.**

| <b>In vivo complementation: Gastrulation defects scored live in midsomitic embryos</b>                          |               |                 |                 |           |                   |                             |                             |
|-----------------------------------------------------------------------------------------------------------------|---------------|-----------------|-----------------|-----------|-------------------|-----------------------------|-----------------------------|
| <b>Injection</b>                                                                                                | <b>Normal</b> | <b>Class I</b>  | <b>Class II</b> | <b>n=</b> | <b>% abnormal</b> | <b>p vs <i>nphp1</i> MO</b> | <b>p vs WT rescue</b>       |
| <i>nphp1</i> MO                                                                                                 | 27            | 29              | 4               | 60        | 55%               | N/A                         |                             |
| <i>nphp1</i> MO + <i>NPHP1</i> WT RNA                                                                           | 38            | 19              | 5               | 62        | 39%               | 0.0027                      | N/A                         |
| <i>nphp1</i> MO + <i>NPHP1</i> c.14G>U RNA                                                                      | 29            | 20              | 10              | 59        | 51%               | <0.0001                     | 0.0017                      |
| <i>nphp1</i> MO + <i>NPHP1</i> c.115C>A RNA                                                                     | 40            | 17              | 4               | 61        | 34%               | 0.0002                      | 0.7126                      |
| <i>nphp1</i> MO + <i>NPHP1</i> c.689C>U RNA                                                                     | 43            | 17              | 5               | 65        | 34%               | <0.0001                     | 0.5444                      |
| <b>Injection</b>                                                                                                | <b>Normal</b> | <b>Class I</b>  | <b>Class II</b> | <b>n=</b> | <b>% abnormal</b> | <b>p vs <i>nphp1</i> MO</b> | <b>p vs WT RNA</b>          |
| <i>NPHP1</i> WT RNA                                                                                             | 43            | 13              | 4               | 60        | 28%               | <0.0001                     | N/A                         |
| <i>NPHP1</i> c.14G>U RNA                                                                                        | 48            | 13              | 4               | 65        | 26%               | <0.0001                     | 0.8842                      |
| <i>NPHP1</i> c.115C>A RNA                                                                                       | 47            | 12              | 3               | 62        | 24%               | <0.0001                     | 0.6114                      |
| <i>NPHP1</i> c.689C>U RNA                                                                                       | 41            | 11              | 4               | 56        | 27%               | <0.0001                     | 0.9697                      |
| <b>In vivo complementation: Renal defects scored in 4 dpf larva stained with Na+/K+ ATPase antibody</b>         |               |                 |                 |           |                   |                             |                             |
| <b>Injection</b>                                                                                                | <b>Normal</b> | <b>Affected</b> |                 | <b>n=</b> | <b>% abnormal</b> | <b>p vs <i>nphp1</i> MO</b> | <b>p vs WT rescue</b>       |
| <i>nphp1</i> MO                                                                                                 | 18            | 28              |                 | 46        | 61%               | N/A                         |                             |
| <i>nphp1</i> MO + <i>NPHP1</i> WT RNA                                                                           | 32            | 14              |                 | 46        | 30%               | <0.0001                     | N/A                         |
| <i>nphp1</i> MO + <i>NPHP1</i> c.14G>U RNA                                                                      | 24            | 25              |                 | 49        | 51%               | 0.0403                      | <0.0001                     |
| <i>nphp1</i> MO + <i>NPHP1</i> c.115C>A RNA                                                                     | 35            | 16              |                 | 51        | 31%               | <0.0001                     | 0.8273                      |
| <i>nphp1</i> MO + <i>NPHP1</i> c.689C>U RNA                                                                     | 34            | 17              |                 | 51        | 33%               | <0.0001                     | 0.5127                      |
| <b>Genetic interaction experiments: Gastrulation defects scored live in midsomitic embryos</b>                  |               |                 |                 |           |                   |                             |                             |
| <b>Morpholino target</b>                                                                                        | <b>Normal</b> | <b>Class I</b>  | <b>Class II</b> | <b>n=</b> | <b>% abnormal</b> | <b>p vs <i>nphp1</i></b>    | <b>p vs <i>bbs</i>-gene</b> |
| <i>nphp1</i>                                                                                                    | 201           | 40              | 14              | 255       | 21%               | N/A                         | N/A                         |
| <i>bbs1</i>                                                                                                     | 54            | 11              | 3               | 68        | 21%               | N/A                         | N/A                         |
| <i>bbs2</i>                                                                                                     | 134           | 25              | 3               | 162       | 17%               | N/A                         | N/A                         |
| <i>bbs7</i>                                                                                                     | 51            | 10              | 3               | 64        | 20%               | N/A                         | N/A                         |
| <i>bbs9</i>                                                                                                     | 116           | 19              | 6               | 141       | 18%               | N/A                         | N/A                         |
| <i>bbs10</i>                                                                                                    | 95            | 17              | 12              | 124       | 23%               | N/A                         | N/A                         |
| <i>bbs1</i> + <i>nphp1</i>                                                                                      | 40            | 18              | 3               | 61        | 34%               | 0.0006                      | 0.0005                      |
| <i>bbs2</i> + <i>nphp1</i>                                                                                      | 89            | 43              | 16              | 148       | 40%               | <0.0001                     | <0.0001                     |
| <i>bbs7</i> + <i>nphp1</i>                                                                                      | 36            | 24              | 4               | 64        | 44%               | <0.0001                     | <0.0001                     |
| <i>bbs9</i> + <i>nphp1</i>                                                                                      | 110           | 41              | 11              | 162       | 32%               | 0.0248                      | 0.0008                      |
| <i>bbs10</i> + <i>nphp1</i>                                                                                     | 68            | 31              | 20              | 119       | 43%               | <0.0001                     | <0.0001                     |
| <b>Genetic interaction experiments: Renal defects scored in 4 dpf larva stained with Na+/K+ ATPase antibody</b> |               |                 |                 |           |                   |                             |                             |
| <b>Morpholino target</b>                                                                                        | <b>Normal</b> | <b>Affected</b> |                 | <b>n=</b> | <b>% abnormal</b> | <b>p vs <i>nphp1</i></b>    | <b>p vs <i>bbs</i>-gene</b> |
| <i>nphp1</i>                                                                                                    | 70            | 25              |                 | 95        | 26%               | N/A                         | N/A                         |
| <i>bbs1</i>                                                                                                     | 39            | 16              |                 | 55        | 29%               | N/A                         | N/A                         |
| <i>bbs2</i>                                                                                                     | 35            | 12              |                 | 47        | 26%               | N/A                         | N/A                         |
| <i>bbs7</i>                                                                                                     | 54            | 10              |                 | 64        | 16%               | N/A                         | N/A                         |
| <i>bbs9</i>                                                                                                     | 13            | 3               |                 | 16        | 19%               | N/A                         | N/A                         |
| <i>bbs10</i>                                                                                                    | 34            | 11              |                 | 45        | 24%               | N/A                         | N/A                         |
| <i>bbs1</i> + <i>nphp1</i>                                                                                      | 35            | 25              |                 | 60        | 42%               | 0.0003                      | 0.0042                      |
| <i>bbs2</i> + <i>nphp1</i>                                                                                      | 14            | 11              |                 | 25        | 44%               | <0.0001                     | <0.0001                     |
| <i>bbs7</i> + <i>nphp1</i>                                                                                      | 32            | 24              |                 | 56        | 43%               | <0.0001                     | <0.0001                     |
| <i>bbs9</i> + <i>nphp1</i>                                                                                      | 13            | 10              |                 | 23        | 43%               | <0.0001                     | <0.0001                     |
| <i>bbs10</i> + <i>nphp1</i>                                                                                     | 31            | 25              |                 | 56        | 45%               | <0.0001                     | <0.0001                     |

N/A=not applicable
